## **Self-identification as a crucial aspect of inclusion of Sexual and Gender Minorities in a Study of Adverse Childhood Experiences in Haiti**

Joseph Heger<sup>a\*</sup>, Phycien Paul<sup>b</sup>, Caleb Jean-Baptiste<sup>b</sup>, Elmondo Odans<sup>b</sup>, Abraham A. Salinas-Miranda<sup>c</sup>, Erin Lynch<sup>a</sup>, Emily Stevens<sup>a</sup>, Guitele J. Rahill<sup>a</sup>, and Manisha Joshi<sup>a</sup>

*<sup>a</sup>School of Social Work, College of Behavioral and Community Sciences (CBCS) University of South Florida (USF), Florida, United States; <sup>b</sup>Organisation pour la Rénovation de la zone de Cite Soleil (Organization for the Renovation of the Cité Soleil Zone) (OREZON Cité Soleil), Port-au-Prince, Haiti; <sup>c</sup>University Of South Florida (USF), College of Public Health, Tampa, Florida (FL), United States of America (USA).*

\*Corresponding author: Joseph Heger, MSW; School of Social Work, College of Behavioral and Community Sciences, USF, Email: [hegerj@usf.edu](mailto:hegerj@usf.edu)

## Notes on Contributors:

**Joseph Heger** holds a Master of Social Work from University of Michigan and a Bachelor of Social Work from USF. At the time of the study, he was a Research Assistant to USF's Social Work Interdisciplinary Research Lab which focuses on prevention of violence and promotion of mental health among individuals in underserved communities. He led the data entry and cleaning process, contributed to data analysis, and to the interpretation and report of findings.

**Phycien Paul** is the President of OREZON Cité Soleil (Organisation pour la Renovation de la Zone de Cité Soleil) in the Cité Soleil zone of Port-au-Prince, Haiti. He led the recruitment of study participants, contributed to the translation and back translation of study measures, and provided feedback on the interpretation of findings.

**Caleb Jean-Baptiste** is Director of Projects and Program Planning for OREZON Cité Soleil. He led efforts to ensure that participants from all sectors of Cité Soleil had the opportunity to participate and helped gain entrée into the neighborhood's gender minority community.

**Elmondo Odans**, is a medical doctor who serves as Chief Medical Counsellor at OREZON Cité Soleil. During this study, he was responsible for training and was available to provide medical and psychological referrals for study participants.

**Abraham Salinas-Miranda** is Director of the USF Harrell Center for the Study of Family Violence and is a Research Assistant Professor at the USF College of Public Health. His research interests include adverse childhood experiences and their effect of health and mental health. He supervised the data entry and data analysis and contributed to the interpretation of findings.

**Erin Lynch** is a student in the Bachelor of Social Work program at USF. She led the literature review of key concepts.

**Emily Stevens** is a student in the Bachelor of Social Work program at USF. She contributed to the literature review of key concepts.

**Guitele Rahill** is an Associate Professor of Social Work in the College of Behavioral and Community Sciences at USF and is the Director of the Social Work Interdisciplinary Lab at USF. She led the translation and backtranslation of the study measures, supervised the data collection and analysis process, and contributed to the interpretation and report of findings.

**Manisha Joshi** is an Associate Professor of Social Work in the College of Behavioral and Community Sciences at USF and the Co-Director of the Social Work Interdisciplinary Lab at USF. She focuses on violence against underserved populations around the globe, with a focus on health effects of Intimate partner violence and non-partner violence and on adapting evidence-based interventions to address violence and its health effects. She contributed to the development of the study measures, the data analysis and interpretation and to the report of findings.

## Abstract

Measures of biopsychosocial are inevitably affected by contextual norms, local ideologies, Social mores, and self-identification as well as extant policies and laws. Self-identification can be often emotionally laden and can be constrained by fear of reprisal if one's self-identification departs from acceptable and affirmed norms. Hence, measurement efforts can be hampered and results from established measures can fail to yield accurate and useful data. ACEs are understudied in Haiti. We investigated adverse childhood experiences (ACEs) in Haiti's urban using the ACE international questionnaire (ACE-IQ). Descriptive statistics permitted exploration of: (1) relationship between participants' self-identification and sex recorded as observed by interviewers, and (2) prevalence of ACEs by self-reported identity. Roughly half participants self-identified as 'Woman' (56%; n = 380), 39% as 'Man' (n = 265), 2% as 'Homosexual' (n = 13), and 2% as 'Lesbian' (n = 14). Contradictions emerged between participant self-identification and interviewers' record of sex: 98% self-identified women were observed/recorded as 'Female', one was observed/recorded as 'Male', and there was no record for 5. Similarly, 95% self-identified men were observed/recorded as 'Male', six as 'Female', two as 'Other', and there was no record for 5. Although SGM constituted a small subsample (n = 27), their responses underscored disproportionate burdens of physical, emotional, sexual abuse, family dysfunction, and interpersonal violence (bullying, community, collective) relative to others. Conducting ACE-IQ studies in Haiti that provide inclusive categories of self-identification may more equitably capture unique ACEs of all Haitians.

Keywords: ACE IQ; LGBTQ+; gender minorities; Haiti; equity.

## **Introduction**

Measures of biopsychosocial are inevitably affected by contextual norms, local ideologies, social mores, and self-identification as well as extant policies and laws. Self-identification can be often emotionally laden and can be constrained by fear of reprisal if one's self-identification departs from acceptable and affirmed norms. Hence, measurement efforts can be hampered and results from established measures can fail to yield accurate and useful data.

ACEs are understudied in Haiti. The need for research that is inclusive and equitable has increased with globalization (Patel and Farmer 2020; Osel et al. 2022). Central to inclusion and equity in research is consideration of how individuals and groups self-identify and inclusion of underrepresented individuals who reside in Lower-Middle Income Countries (LMIC) such as Haiti (Hamadeh, Rompaey, and Metreau 2021).

The present work summarizes lessons learned while conducting a larger study of adverse childhood experiences (ACEs), exposure to neighbourhood violence and behavioural outcomes of violence exposure in Haiti. Within that study, a related aim was to maximize representation of typically neglected sexual and gender minorities (SGM), especially those who reside in Cité Soleil, a zone that is disproportionately impacted by extreme poverty and violence. We did so based on a previous study which reported that transwomen, a subpopulation of SGM in Haiti are prone to the same GBV rapes and other forms of violence as non-gender minorities who were assigned female at birth (Rahill, Joshi, Galea, & Ollis, 2019).

### ***Haiti***

Haiti has a long history of trauma stemming from both internal and external sources.

Indeed, Haiti's experience of interpersonal violence began with its birth in violence as former Haitian slaves gained their independence from French forces, and "disjunctures in the post-revolutionary governance of Haiti created conditions of precarity, vulnerability, and pre-empted possibilities for development" (Charles, 2021, p.465). Indeed, Haiti's independence was followed by centuries of interpersonal violence, including the recent assassination of its president (Sanon and Cotto 2022). In recent years, Haiti earned the dubious recognition of being the most kidnapping-impacted nation in the world (O'Connell 2021; United States Department of State, n.d.). In recent weeks, it has been determined that a multinational force needs to be deployed to Haiti to begin quelling the violence and restore order and safety to the populace (Haitian Times, 2023).

Gender-based violence (GBV), is one form of interpersonal violence that is commonplace in Haiti. Interpersonal violence includes physical, sexual, domestic, community, and psychological violence in the form of threats of violence against persons assigned female at birth, including trans girls and women (Human Rights Watch 2021; Rahill, Joshi and Shadowens 2018). GBV in Haiti also comprises exclusion of sexual and gender minorities (SGM) in research and intervention.

### *Haiti's Cité Soleil*

Cité Soleil, phonetically "See'tay So'Lay", is situated in Haiti's capital (Port-au-Prince); it has roughly 400,000 residents crowded in < 9 square miles (Buschschlüter 2014). Cité Soleil comprises 30 sectors, each governed by feared gang leaders, and jointly reporting more than 200 murders fortnightly (Buschschlüter 2022; Rahill et al. 2019). Nevertheless, its non-criminal residents are peace-loving and intelligent, treasure education, and long for safety and security (Torgan 2019).

In Cité Soleil, a complex interaction of extreme poverty, structural and community violence, experience of traumatic events across the lifespan, sleep disruptions, infectious diseases, and youths' involvement in gang warfare result in a life expectancy of 45-50 years, lower than Haiti's 64 years (Buschschlüter 2014; World Population 2022). Thus, the zone's population is quite young.

For Cité Soleil SGM, the experience of interpersonal and community violence is intensified by religious beliefs that disparage non-heteronormative gender expression, local norms that minimize the worth of women, widespread substance use, and easy access to weapons (Durban-Albrecht 2017; Joshi et al. 2021). In addition, a 2020 penal code in Haiti prescribes imprisonment for crimes against SGM, falls short of removing steep financial penalties for same-sex marriage and prohibits a certificate of good standing to non-cisgender and non-heterosexual individuals (Human Rights Watch 2021). It follows that the health and well-being of SGM are important topics for research and intervention. However, a potential obstacle to effective representation and inclusion of Haitian SGM may be media representation of Haiti and research bias.

During 2013, LGBTQ+ protests cooccurred in Haiti and France. But media portrayal of Haiti juxtaposed an unruly Haiti against the calm and collective France, its former colonizer, showcasing Haitian protestors as animalistic and French protestors as peaceful (Durban-Albrecht 2017). Yet, cases of homophobic violence occurred at much higher rates in France during these protests (Durban-Albrecht 2017). Moreover, even within studies that attempt to purposefully include SGM in Haiti, there has been intentional and unintentional exclusion during data collection (Rahill, Joshi, and Shadowens 2018). The cumulative trauma of interpersonal, community, media and structural violence presumably will be worse when compounded by ACEs, as described below, and particularly when sexual and gender identity that depart from cultural norms

are evident in childhood. Yet, to our knowledge, no current study contributes to understanding ACEs of Haitians or of Haitian SGM.

### **Adverse childhood experiences (ACEs)**

ACEs include experiences of child neglect, child and adolescent sexual abuse (CASA), as well as exposure to substance abuse, domestic, peer, community and gang violence (Centers for Disease Control and Prevention 2021). ACEs give rise to poor biopsychosocial outcomes across the life cycle. Indeed,

...considerable and prolonged stress in childhood has life-long consequences...can disrupt early brain development and compromise functioning of the nervous and immune systems...can lead to serious problems such as alcoholism, depression, eating disorders, unsafe sex, HIV/AIDS, heart disease, cancer... (World Health Organization [WHO] 2020).

### ***Assessing ACEs in international settings***

ACEs have been studied in LIC/LMIC such as Nigeria (Kazeem 2015), Malawi (Kidman, Piccolo, and Kohler, 2020), and similar settings, using the Adverse Child Experiences International Questionnaire (ACE-IQ). The ACE-IQ, a structured instrument developed for individuals aged 18 or older (WHO 2020), is a gold standard measurement of childhood adversities and comparisons of such adversities across nations. The ACE-IQ enables: (1) comparison of ACEs across nations; (2) associations between childhood adversities and health risk behaviours and health outcomes in later life; (3) advocacy for increased investments to reduce childhood adversities; and (4) provision of scientific knowledge to inform appropriate prevention programmes (WHO 2020).

Although the ACE-IQ may lack focus on global concerns unique to LIC/LMIC (Pereira 2019; Rutter 2021), it is widely considered credible, valid, and reliable in

global health research. For Haitian SGM, whose identities and social positions in the local, regional, and global environments constitute explicit risks to their safety and health, knowledge of ACEs is crucial.

### **Sexual and gender minorities (SGM)**

Sexual and gender minorities (SGM) comprise:

... individuals who identify as lesbian, gay, bisexual, asexual, transgender, Two-Spirit, queer, and/or intersex. Individuals with same-sex or -gender attractions or behaviors and those with a difference in sex development ...those who do not self-identify with one of these terms but whose sexual orientation, gender identity or expression, or reproductive development is characterized by non-binary constructs of sexual orientation, gender, and/or sex (National Institutes of Health [NIH] 2019).

Self-identification, based on the latter definition of SGM, is important for SGM research, especially in Cité Soleil where rampant marginalization and disparaging community labels of SGM mar self-identification (Rahill, et al. 2018).

### ***Key concepts pertinent to research with SGM***

#### *Sex*

Sex is assigned at birth based on chromosomes and genitals: individuals with XX chromosomes, ovaries, and oestrogen are labelled female; individuals with XY chromosomes, testes, and testosterone are labelled male (National Academies of Sciences, Engineering, and Medicine [NASEM] 2022). This socially constructed classification of individuals based on reproductive anatomy, i.e., the male/female or man/woman binary has been the norm, historically (NASEM 2022). Nevertheless, 1 in 2,000 people are born with anatomy and/or chromosomes that do not fall into either of the latter categories, i.e., are Intersex (NASEM 2022).



There are approximately two dozen intersex traits (e.g., individuals with complete androgen insensitivity syndrome [CAIS]) (Singh and Ilyayeva 2022). People with CAIS are often female presenting, have a vagina and undescended testes along with XY chromosomes, are often pressured to classify as either a man or woman, and often struggle with gender identity (Singh et al. 2022). Some individuals with CAIS are subjected to “corrective” procedures to place them medically closer to one side of the binary. Proper identification is essential to the overall wellbeing of persons with non-heteronormative sexual and gender identities and to their personal dignity and autonomy.

### *Gender*

Gender is central to understanding health inequities and why they exist (WHO 2020). Although often conflated, the concepts of sex, gender, gender identity, gender expression, transgender and sexuality must be disentangled for equitable research and treatment of SGM (NASEM 2022). Gender is socially constructed and is historically defined based on norms, roles, and behaviours that a given society deems appropriate, based on an individual’s birth sex (WHO 2021). Today, gender norms typically refer to societal beliefs about gender and sex, and gender roles typically refer to what society expects each gender to do at home, work, and other settings (WHO 2021).

One’s experiences and feelings about how they perceive their gender is known as gender identity, which may or may not coincide with the sex and/or gender assigned to them (WHO 2021). Gender identities inform how individuals experience their bodies, their manner of dress or decisions to modify the physical structure of their bodies, their sexual orientation, and/or their linguistic and behavioural expressions (NIH 2019).

Gender expression is the performance and enactment of gender. It is not always consonant with gender presentation or with sexual orientation. For example, an

individual who identifies as gender-fluid can be female-presenting and have partners that are homosexual, heterosexual, or pansexual. Importantly, one's gender expression does not constitute a valid method for categorization for purposes of service provision since a person's gender expression may not match their gender identity, and sexuality and gender both exist on a continuum (Restar et al. 2021).

Transgender describes individuals whose gender identity or expression diverges from culturally constructed categories for sex and gender. Within the transgender category, there are trans-men, trans-women, and sometimes individuals who identify as nonbinary, and who may assume gender roles based on their self-identification (Rahill et al. 2018). Gender norms and roles establish gender relations, and these relations often create hierarchies that result in disadvantages for one or more genders (WHO 2021).

### *Sexuality*

Sexuality refers to an individual's romantic, sexual, and/or emotional attractions to others. A person may be sexually but not romantically attracted to a certain gender (Jourian 2015).

### ***Health disparities and SGM***

A growing body of literature sheds light on the unique ACEs of SGM and associated outcomes (Felitti et al. 1998; Hollinsaid et al. 2020; Mustanski et al. 2021; Qureshi, Zha, and Porter 2022; Schnarrs et al. 2022). This body of knowledge indicates that SGM bear a disproportionate burden of societal ills and of health disparities, including but not limited to psychological distress, mood disturbances, sleep disruptions, trauma, heart conditions, anxiety, and death from interpersonal violence or disease (Andersen and Blosnich 2013; Lund and Burgess 2021).

### *Health disparities and SGM in Haiti and in Cité Soleil*

Health disparities for SGM in Cité Soleil are associated with socio-political conditions and Haiti's poor record of human rights that sustain alienation, stigmatization, and violence towards SGM.

SGM in Cité Soleil reportedly face violence such as bullying, stabbings, beatings, being shot, emotional abuse, sleep deprivation, and sexual coercion while grappling with Haiti's apparent lack of rape empathy (Rahill et al. 2020; Joshi et al. 2021). Previous studies report that Haitian SGM and their heteronormative neighbours lack awareness of terminology that would clarify distinctions among sex, gender, gender identity, gender roles and gender expression and, therefore, self-identify using pejorative terms imposed by a homophobic and transphobic society (Rahill et al. 2020). Moreover, threat of harm for Haitian SGM is not restricted to violence but encompasses health disparities. Indeed, HIV prevalence for SGM has increased while Haiti's prevalence has declined from over 3% to less than 2% (Dévieux et al. 2022).

## **Materials and Methods**

### *Study Design*

This cross-sectional, community survey was conducted between November 2020 and January 2021 by Haiti-based colleagues at XX (blinded for review). XX is a community-based social service organization that enjoys the trust and respect of the community. Our research team has collaborated with XX in previous research that is pertinent to Cité Soleil residents and that builds their capacity. XX colleagues were certified in the protection of human subjects through Family Health International.

This study follows the WHO's recommendations for administering the ACE-IQ: (1) established rapport with key stakeholder organizations; (2) ensured availability of

service referrals to support participants; (3) translated the ACE-IQ from English to Haitian *Kreyòl* and then back to Haitian *Kreyòl*, to maximize linguistic accuracy (WHO 2018).

XX colleagues used venue-based and convenience sampling to recruit 673 volunteer participants across Cité Soleil's 30 sectors. Upon completion of the informed consent process, participants (18 years and older) completed the ACE-IQ, sociodemographic questions, and questions based on previous studies in Cité Soleil. Given our objective of maximizing SGM representation, XX colleagues intentionally recruited in SGM enclaves of Cité Soleil. One recruited person did not respond to the self-identification question (i.e., "How do you identify") and was dropped. Our final sample was 672.

At XX colleagues' request, our university (blinded for review) signed a data use agreement, following which we obtained the approval of our university's Institutional Review Board to analyze and interpret the data with them.

### ***Measures***

The ACE-IQ was developed for individuals 18 years and older, to assess

...some of the most intensive and frequently occurring sources of stress that children may suffer early in life...multiple types of abuse; neglect; violence between parents or caregivers; other kinds of serious household dysfunction such as alcohol and substance abuse; and peer, community, and collective violence... (WHO 2022).

The ACE-IQ measures 13 categories of ACEs divided into four dimensions (see Table 1 for details): (1) Abuse (physical, emotional, contact sexual); (2) Parental neglect; (3) Family dysfunction, and (4) Violence outside the household (WHO 2022).

We used the full ACE-IQ, with one adaptation to the first item (i.e., Sex) that requires the interviewer to ‘Record Male/Female as observed.’ We added ‘Other’, to prevent forcing the interviewer to record a participant as either Male or Female when unsure.

We added a question which solicited how participants self-identified in terms of gender and sexual orientation. The response categories included: as a *woman*, *man*, *homosexual*, *lesbian*, and *I have a different identification*. Although we are aware that *woman* and *man* denote sex and *homosexual* and *lesbian* denote sexual orientation, we used these terms based on extant knowledge that contextual nomenclature for non-heteronormative persons in Haiti are typically adopted and used by Cité Soleil SGM (Joshi et al. 2021). We further added 20 socio-demographic questions such as age, relationship status, education, employment status, and income.

### ***Analysis***

The ACE-IQ has two options for coding, binary (yes, no) or frequency (e.g., many times, few times, one, never). We used the frequency option, enabling examination of differences in ACE severity (WHO 2022).

Descriptive statistics permitted exploration of participants’ socio-demographics, self-identification (gender, sexual orientation), responses to sex as observed and recorded by the interviewer, and differences in ACEs by self-identification categories (i.e., man, woman, homosexual, lesbian, other). Of particular interest was exploration of the overlap (or lack thereof) between interviewers’ record of ‘Sex as observed’ and participants’ self-identification in terms of gender and sexual orientation. Tests of statistical inference were omitted given the small sample sizes for the participants who identified as homosexual (n=13) and lesbian (n=14) (Contextually normed and accepted

cover term for non-binary and non-heteronormative persons in Haiti) (Rahill et al. 2019). STATA version 17 was used for analyses.

## **Results**

### ***Participant characteristics***

Most of our sample (N=672) was younger than 31 years (n = 463; 72.5%), corroborating previous findings of Cité Soleil's young population (Rahill et al. 2022; Bouwsystemen 2014). Three-fourth of the sample had not completed the equivalent of a United States high school education (n = 463; 72.5%), and over half (n=384; 58.6%) were unemployed.

More than half of participants (n = 388; 58%) were recorded by the interviewer as female and about two-fifth (n = 256; 38%) as male. The remaining 3% (n=19) were marked as other and data were missing for 1.5% participants (n=10).

More than half of participants self-identified as 'woman' (n = 380; 56%) and about two-fifth (n = 265; 39%) as a 'man.' About 2% self-identified as 'homosexual' (n = 13) and another 2% (n = 14) self-identified as 'lesbian.'

### ***Relationship between sex recorded as observed and self-identification (gender, sexual orientation)***

Of those who self-identified as woman (n=380), a substantial majority (n = 374; 98.42%) were observed/recorded by the interviewer as female, one as male, and for 5 there was no record. Similarly, of those who self-identified as man (n=265), a substantial majority (n = 252; 95.09%) were observed/recorded as male, six as female, 2 as other, and there was no interviewer record for 5. For the 13 participants who self-identified as homosexual, a majority (n=10) were recorded by the interviewer as other,

2 as male, and 1 as female. Half (n = 7; 50%) of those who self-identified as lesbian (n=14) were recorded by the interviewer as other, 6 as female, and 1 as male.

### ***Domains of ACE-IQ***

Table 1 presents a comprehensive picture of ACE domains by self-identified categories. Although sample sizes for self-identified as homosexual or lesbian were small, the ACE patterns that emerged are noteworthy. Some findings are highlighted below.

#### *Abuse (physical, emotional, sexual)*

Prevalence of physical, emotional, and sexual abuse was high in the full sample (64% to 74%, 63% to 73%, and 20% to 43%, respectively). However, notable differences in frequency and severity emerged by self-identification categories. A higher percentage of self-identified homosexuals and lesbians endorsed ‘many times’ for all types of abuse compared to self-identifying women or men. For instance, about two-third of self-identified homosexuals (61.54%) and one-third of self-identified lesbians (35.17%) said a parent/household member had hit/cut them many times, compared to 26.84% of self-identified women and 21.89% of self-identified men. A substantial majority of self-identified lesbians (85.71%) and more than two-third of self-identified homosexuals (69.23%) reported threat or actual abandonment by a parent/household member many times, compared to less than one-third of self-identified women (29.47%) and one-fifth of self-identified men (18.49%). All sexual abuse items elicited similar response patterns including forced intercourse. More than two-third (69.23%) of self-identified homosexuals and about three-fifth of self-identified lesbians (57.14%) had been subjected to oral/anal/vaginal intercourse many times, compared to 5% and 1.13% of self-identified women and men respectively.

### *Family dysfunction*

Prevalence of family dysfunction was highest for individuals self-identifying as homosexual or lesbian. In comparison to self-identified women or men, much higher percentages of self-identified homosexuals and lesbians reported living with an alcoholic/drug abusing household member (49.74% and 43.02% versus 92.31% and 85.71% respectively), and with a household member who was mentally ill (35.53% and 35.47% versus 53.85% and 71.43% respectively). Over half of self-identified homosexuals (53.85%) and about two-fifth of self-identified lesbians (42.86%) had witnessed a family member get hit or cut many times (versus 21.58% self-identified women and 13.96% self-identified men).

### *Neglect by parents*

The findings related to neglect as an ACE were mixed. For instance, about two-thirds of self-identified homosexuals (61.54%) and three-fourth of self-identified lesbians (78.57%) revealed that at least one time a parent/guardian was too intoxicated to be able to take care of them (versus 38.42% self-identified women, 27.55% self-identified men). In relation to food deprivation even when food is available, 85.7% self-identified lesbians had experienced that at least once. Such neglect was also reported by 69% self-identified homosexuals, closely followed by self-identified women at 64.42% and self-identified men at 58.36%. As high as 93% of self-identified lesbians (93%), two-third of self-identified homosexuals (61.43%) and about half of self-identified women (46.84%) said at least one time a parent/guardian had not sent them to school even when available compared to one-third of self-identified men (30.20%).

### *Violence outside the household*

Prevalence of bullying was widespread (81% of the full sample reported at least one



victimization). Notably, all self-identified homosexuals and 86% of self-identified lesbians had experienced frequent bullying.

Consistent with extant knowledge of interpersonal violence in Cité Soleil, 65.03% of the entire sample reported often seeing or hearing community members getting beaten up, threatened with a knife/gun (52.08%), or stabbed/shot (37.65%). However, as evident from Table 1, percentages were higher for self-identified homosexuals and lesbians, than for self-identified women and men.

Regarding collective violence, a substantial percentage of our full sample reported forced relocation (73.66%). However, consistent with previous findings (Joshi et al. 2021), women relocated more frequently, followed by self-identified lesbians, men, and homosexuals (38.68%, 35.71%, 29.06%, and 23.08% respectively). Further, about 38% of the full sample said they endured beatings from soldiers/police/militia/gangs. Again, a higher percentage of self-identified homosexuals and lesbians reported such beatings ‘many times’ (38.46%, 28.57% respectively) in comparison to 11.84% self-identified women and 8.68% self-identified men.

## **Discussion**

We set out to assess ACEs in Haiti’s Cité Soleil and to intentionally include underrepresented SGM. We found a high prevalence of physical, emotional, and sexual abuse in the full sample. However, a higher percentage of SGM subsample reported a higher frequency and severity of ACEs than others. On all items related to interpersonal violence during childhood, participants in the SGM sub sample reported having a household member in prison, a household member with substance abuse issues or mental illness, as well as having witnessed exposure to some form of domestic violence or loss of a parent through death or separation. In addition, SGM participants reported

not finding understanding or concern from parents, being deprived of basic needs, forced relocation, bullying and other forms of violence outside the home.

The finding, despite the small SGM sub-sample, that a higher percentage of self-identified homosexuals and lesbians endorsed ‘many times’ for all items of abuse compared to others suggests a need for further research using a contextually grounded but evidence-informed version of the ACE-IQ. This is salient in view of extant knowledge regarding adverse biopsychosocial impacts of ACEs on individuals and on the additional distress experienced by SGM in Haiti and globally.

Our findings have significant implications for trauma symptoms, depression, anxiety, and other psychological distress, especially given the known health and mental health disparities between Haitians and others in the Caribbean region, and health disparities between SGM and others globally (Andersen et al. 2013; Lund and Burgess 2021).

### ***Limitations***

The study used non-probability sampling methods in a cross-sectional survey; hence, findings cannot be generalized to Haiti or beyond the study timeframe. Our participants self-reported on situations that happened before the age of 18; hence, data were subject to recall bias. In addition, data collectors reported accommodating participants who could not read by administering the survey to them, which is how the ACE-IQ should have been administered to all participants. Given the sensitive nature of questions, responses were subject to social desirability.

Despite its limitations, including a small SGM subsample, this study offers a first step in recognizing potentially disproportionate burden of ACEs experienced by SGM in Haiti's Cite Soleil.

## Conclusion

Our findings underscore what has long been known, that measures of social or psychological functioning are:

...affected in a variety of ways by political, social, and philosophical considerations [and] personal attitudes, often emotionally laden, tend to color measurement efforts...[Thus]...representatives of the minority groups, with an understanding of the testing and measurement requirements of their groups, should be involved in the [development] (Sharma, 1986, p. 122).

Such involvement might enable more more distinct and comprehensive categories to disentangle sex, gender, and sexual orientation as well as self-identified roles and preferences, which would be beneficial in future iterations of the ACE-IQ. For example, in this study, in the absence of an ‘Other’ category, the interviewer perhaps would have recorded 19 individuals as either male or female or would have left it blank. Further, for the 10 participants with no record, perhaps, the interviewer was either unsure of the category or indeed missed the item. Further, the self-identification item did not provide participants the opportunity to ‘Check all that apply’; thus, the categories of gender and sexual orientation were conflated, and they were forced to either pick a gender or a sexual orientation, not both. Also noteworthy is that none of the participants reported ‘I have a different identification.’ Perhaps, the participants were either satisfied with response categories offered or were unaware of alternative terminologies that can be used to identify one’s gender and sexual orientation.

The question on sex and gender in an instrument such as the ACE-IQ, which is often used in LMICs, may need to be preceded by a brief paragraph which details distinctions among sex, gender, sexual orientation, and cultural roles assumed by SGM

in various contexts. This would provide a unique opportunity to: (1) increase knowledge among Haiti's SGM about available options for self-classification, and (2) reject contextual norms that identify them in terms of sexual orientation rather than gender identity. For example, the ACE-IQ item 'Sex as observed/recorded' was difficult in this context and data collectors reported leaving that item blank since the meaning of observed was not clear. They indicated that in Haiti, individuals are categorized based on the roles they perform in society, which in turn is based on individuals' manner of dress, gender expression or perceived sexual orientation. Moreover, our colleagues clarified that in Haiti, the terms male and female describe animals for reproductive purposes and that the terms masculine or feminine are used to describe men and women. Thus, context as well as language may need to be considered when administering the ACE-IQ in settings where individuals' roles take precedence over their sex or self-identification (Rahill et al. 2021).

To our knowledge, this is among the first ACE-IQ administration in Haiti, and the first to intentionally include SGM and to consider self-identification in a community survey. This study offers several lessons for the field in terms of conducting equitable research that underscores the importance of inclusiveness of different populations (e.g., how to frame questions that offer SGM populations more freedom in terms of answering questions related to gender, gender identity, gender expression, sexual orientation; role of context in collecting data using ACE-IQ).

Finally, ACEs can have devastating outcomes when positive childhood experiences (PCEs) are few/absent and when followed by adult experiences of violence, ACEs can exacerbate health and behavioural risk factors (Children's Bureau 2020; Pereira 2019). Interventions that provide PCEs for Cité Soleil residents, with particular

emphasis on those whose SGM identities are emerging, might help mitigate adverse biopsychosocial experiences across the lifespan.

## **Acknowledgements**

We thank all our study participants for sharing their experiences.

## **Disclosure Statement**

No potential conflict of interest.

## References

- Andersen, J. P., and J. Blosnich, 2013. “Disparities in Adverse Childhood Experiences among Sexual Minority and Heterosexual Adults: Results from a Multi-State Probability-based Sample.” *PLoS ONE* 8 (1): e54691. doi: 10.1371/journal.pone.0054691
- Buschschlüter, V. 2022. “Haiti Gang Violence: 209 Killed in Cité Soleil in 10 Days.” *BBC News*, July 26. Accessed 14 November 2022.  
<https://www.bbc.com/news/world-latin-america-62292007>
- Buschschlüter, V. 2014. “Cité Soleil Haiti : Port-au-Prince, Haiti.” Accessed 15 October 2022. <http://www.veerhuis.eu/>
- Centers for Disease Control and Prevention (CDC). 2021. “Vital Signs: Adverse Childhood Experiences.” Accessed 3 October 2022.  
<https://www.cdc.gov/vitalsigns/aces/index.html>
- Children’s Bureau. 2020. “Protective Factors Approaches in Child Welfare.” Accessed 10 November. [https://www.childwelfare.gov/pubPDFs/protective\\_factors.pdf](https://www.childwelfare.gov/pubPDFs/protective_factors.pdf)
- Dévieux, J. G., J. Vertovec, M. Jean-Gilles, R. Rosenberg, C. René, E. Cyrus, S. E. Jean, and W. Dunbar. 2022. “Patterns of Sexual and HIV-related Stigma among Men who have Sex with Men and Women Living with HIV in Haiti. *Scientific Reports* 12 (1):7511. doi: 10.1038/s41598-022-11647-1
- Durban-Albrecht, E. L. 2017. “Performing Postcolonial Homophobia: A Decolonial Analysis of the 2013 Public Demonstrations Against Same-sex Marriage in Haiti.” *Women & Performance: A Journal of Feminist Theory* 27 (2): 160-175. doi: 10.1080/0740770X.2017.1315229.
- Felitti, V. J., R. F. Anda, D. Nordenberg, D. F. Williamson, A. M. Spitz, V. Edwards, M. P. Koss, and J. S. Marks. 1998. “Relationship of Childhood Abuse and Household Dysfunction to Many of the Leading Causes of Death in Adults: The Adverse Childhood Experiences (ACE) Study. *American Journal of Preventive Medicine* 14 (4):245-58. doi: 10.1016/s0749-3797(98)00017-8.
- Hamadeh, N., C. Van Rompaey, and E. Metreau, 2021. “World Bank Country Classifications.” Accessed 10 September 2022.  
<https://datahelpdesk.worldbank.org/knowledgebase/articles/906519-world-bank-country-and-lending-groups>



- Hollinsaid, N., M. Price, E. Bokhour, and G. Kaufman. 2020. "A Qualitative Analysis of Adverse Childhood Experiences in Gender Minority adolescents." Paper presented at the American Psychological Association Convention, August 6-9. [https://www.researchgate.net/publication/341294081\\_A\\_Qualitative\\_Analysis\\_of\\_Adverse\\_Childhood\\_Experiences\\_in\\_Gender\\_Minority\\_Adolescents](https://www.researchgate.net/publication/341294081_A_Qualitative_Analysis_of_Adverse_Childhood_Experiences_in_Gender_Minority_Adolescents)
- Human Rights Watch. 2021. "Haiti: Sexual Orientation and Gender Identity." <https://www.hrw.org/world-report/2021/country-chapters/haiti#e81181>
- Joshi, M., G. J. Rahill, C. Carrington, A. Mabie, A. Salinas-Miranda, N. Thomas, A. Morales, L. Grippo, and A. Grey. 2021. "They are Not Satisfied until They See Our Blood: Syndemic HIV Risks for Trans women in Urban Haiti." *International Journal of Mental Health* 50 (4): 337-367. doi: 10.1080/00207411.2021.1891364
- Jourian, T. J. 2015. "Evolving Nature of Sexual Orientation and Gender Identity." *New Directions for Student Services* Winter 2015 (152): 11-23. doi:10.1002/ss.20142
- Kazeem, O. T. 2015. "A Validation of the Adverse Childhood Experiences Scale in Nigeria." *Research on Humanities and Social Sciences* 5 (11). Published Online. <https://core.ac.uk/download/pdf/234674573.pdf>
- Khan, T., S. Abimbola, S. Kyobutungi, and M. Pai. 2022. "How We Classify Countries and People." *BMJ Global Health* 7 (6). doi: [10.1136/bmjgh-2022-009704](https://doi.org/10.1136/bmjgh-2022-009704)
- Kidman, R., L. Piccolo, and H. Kohler. 2020. "Adverse Childhood Experiences: Prevalence and Association with Adolescent Health in Malawi." *American Journal of Preventive Medicine* 58 (2):285-293. doi: 10.1016/j.amepre.2019.08.028
- Lund, E. M., and C. M. Burgess. 2021. "Sexual and Gender Minority Health Care Disparities: Barriers to Care and Strategies to Bridge the Gap." *Primary Care* 48 (2):179-189. doi: 10.1016/j.pop.2021.02.007.
- Mustanski, B., S. Whitton, M. E. Newcomb, A. Clifford, D. T. Ryan, and R. D. Gibbons. 2021. "Predicting Suicidality using a Computer Adaptive Test: Two Longitudinal Studies of Sexual and Gender Minority Youth." *Journal of Consulting and Clinical Psychology* 89 (3):166-175. doi: 10.1037/ccp0000531
- National Academies of Sciences, Engineering, and Medicine (NASEM). 2022. "Measuring Sex, Gender Identity, and Sexual Orientation." Washington, DC: National Academies Press. Accessed 10 August 2022. <https://doi.org/10.17226/26424>.

- National Institutes of Health (NIH). 2019. "Sexual and Gender Minority Populations in NIH-Supported Research." Accessed 10 November 2022.  
<https://grants.nih.gov/grants/guide/notice-files/NOT-OD-19-139.html>.
- O'Connell, O. 2021. "400 Mawozo: Notorious Gang Suspected of Kidnapping of Missionaries as Haiti's Turmoil Continues." *Independent*, October 17. Accessed 14 November 2022. <https://www.independent.co.uk/news/world/americas/400-mawozo-gang-haiti-kidnappings-b1939905.html>
- Osel, A., C. G. Paz, M. Stuparich, R. Racatalan-Gavan, L. Nelms, Y. Suliman, A. Smith, and M. Bajwa. 2022. "Screening for Toxic Stress Response and Buffering Factors: A Case-based Trauma-informed Approach to Health Equity." *MedEdPORTAL* OpenAccess.  
[https://www.ncbi.nlm.nih.gov/pmc/articles/PMC8894523/pdf/mep\\_2374-8265.11224.pdf](https://www.ncbi.nlm.nih.gov/pmc/articles/PMC8894523/pdf/mep_2374-8265.11224.pdf)
- Patel, V., and P. Farmer. 2020. "The Moral Case for Global Mental Health Delivery." *The Lancet* 395:108-109.  
<http://documents1.worldbank.org/curated/en/806971509982511950/pdf/ICR-Main-Documents-P106699-2017-10-31-19-45-11022017.pdf>
- Pereira, P. P. G. 2019. *Queer in the Tropics: Gender and Sexuality in the Global South*. Switzerland: Springer. <https://doi.org/10.1007/978-3-030-15074-7>
- Qureshi, R., P. Zha, and S. Porter. 2022. "Adverse Childhood Experiences and Utilization of Healthcare among Gen Z Sexual and Gender Minorities." *Journal of LGBT Youth*. Published online. doi: [10.1080/19361653.2022.2075516](https://doi.org/10.1080/19361653.2022.2075516)
- Rahill, G. J., M. Joshi, J. Blanc, K. Littlewood, A. Salinas-Miranda, and C. Rice. 2022. "Self-Reported Sleep Disturbance Patterns in Urban Haitians: A Latent Class Analysis." *International Journal of Mental Health*. Published online. doi: 10.1080/00207411.2022.2041266
- Rahill, G. J., M. Joshi, J. Galea, and J. Ollis. 2019. "Experiences of Sexual and Gender Minorities in an Urban Enclave of Haiti: Despised, Beaten, Stoned, Stabbed, Shot and Raped." *Journal of Culture, Health, and Sexuality* 18:1-15. doi: 10.1080/13691058.2019.1628305
- Rahill, G. J., M. Joshi, and W. Shadowens. 2018. "Best Intentions Are Not Best Practices: Lessons Learned while Conducting Human Research with Trauma-impacted Female Victims of Non-partner Sexual Violence in Haiti." *Journal of Black Psychology* 44 (7): 595-625. doi: 10.1177/0095798418810054.

- Restar, A. J., J. Sherwood, A. Edeza, C. Collins, and D. Operario. 2021. "Expanding Gender-Based Health Equity Framework for Transgender Populations." *Transgender Health* 6 (1):1-4. doi: 10.1089/trgh.2020.0026.
- Rutter, A. 2021. "Relevance of Adverse Childhood Experiences-IQ to Working Children." *Children* 8 (10):897. doi: 10.3390/children8100897.
- Sanon, E., and D. Coto. 2021. "President Moïse Assassinated at Home". *Apnews*, July 7. Accessed 12 September 2022. <https://apnews.com/article/haiti-president-jovenel-moise-killed-b56a0f8fec0832028bdc51e8d59c6af2>
- Schnarrs, P. W., A. L. Stone, M. A. Bond, R. Salcido, A. A. Dorri, and C. B. Nemeroff. 2022. "Development and Psychometric Properties of the Sexual and Gender Minority Adverse Childhood Experiences: Effect on Sexual and Gender Minority Adult Mental Health." *Journal of Child Abuse and Neglect* 127 (1055700): 1-17. doi: 10.1016/j.chiabu.2022.105570
- Singh, S., and S. Ilyayeva. 2022. "Androgen Insensitivity Syndrome." Treasure Island, FL: StatPearls Publishing. Accessed 20 September 2022. <https://www.ncbi.nlm.nih.gov/books/NBK542206/>
- Torgan, A. 2019. "Creating an Oasis of Hope in one of Haiti's Most Dangerous Neighborhoods." *CNN*. Accessed 1 November 2022. <https://www.cnn.com/2019/08/01/world/cnnheroes-daniel-tillias-sakala/index.html>
- United States of America Department of State. "The United States and the Haitian Revolution, 1791–1804". Accessed 2 September 2022. <https://history.state.gov/milestones/1784-1800/haitian-rev>
- World Health Organization (WHO). 2020. "Adverse Childhood Experiences International Questionnaire (ACE-IQ)." Accessed 5 September 2022. [https://www.who.int/publications/m/item/adverse-childhood-experiences-international-questionnaire-\(ace-iq\)](https://www.who.int/publications/m/item/adverse-childhood-experiences-international-questionnaire-(ace-iq))
- WHO. 2020. "Incorporating Gender Analysis into Research on Infectious Diseases of Poverty." Geneva: WHO. Accessed 10 September 2022. <https://apps.who.int/iris/handle/10665/334355>
- WHO. 2021. "Why Gender Matters." Geneva: WHO. Accessed 10 September 2022. <https://www.who.int/publications/i/item/9789240033948>
- World Population Review. 2022. "Haiti Population 2022." Accessed 15 March 2022. <https://worldpopulationreview.com/countries/haiti-population>
